# Supplementary material for: Chronic myeloid leukemia: the paradigm of targeting oncogenic tyrosine kinase signaling and counteracting resistance for successful cancer therapy
Source: Springer Nature journal article supplement (doi:10.1186/s12943-018-0780-6), 2018-02-15
Supplement: MOESM1 [file 15474718]

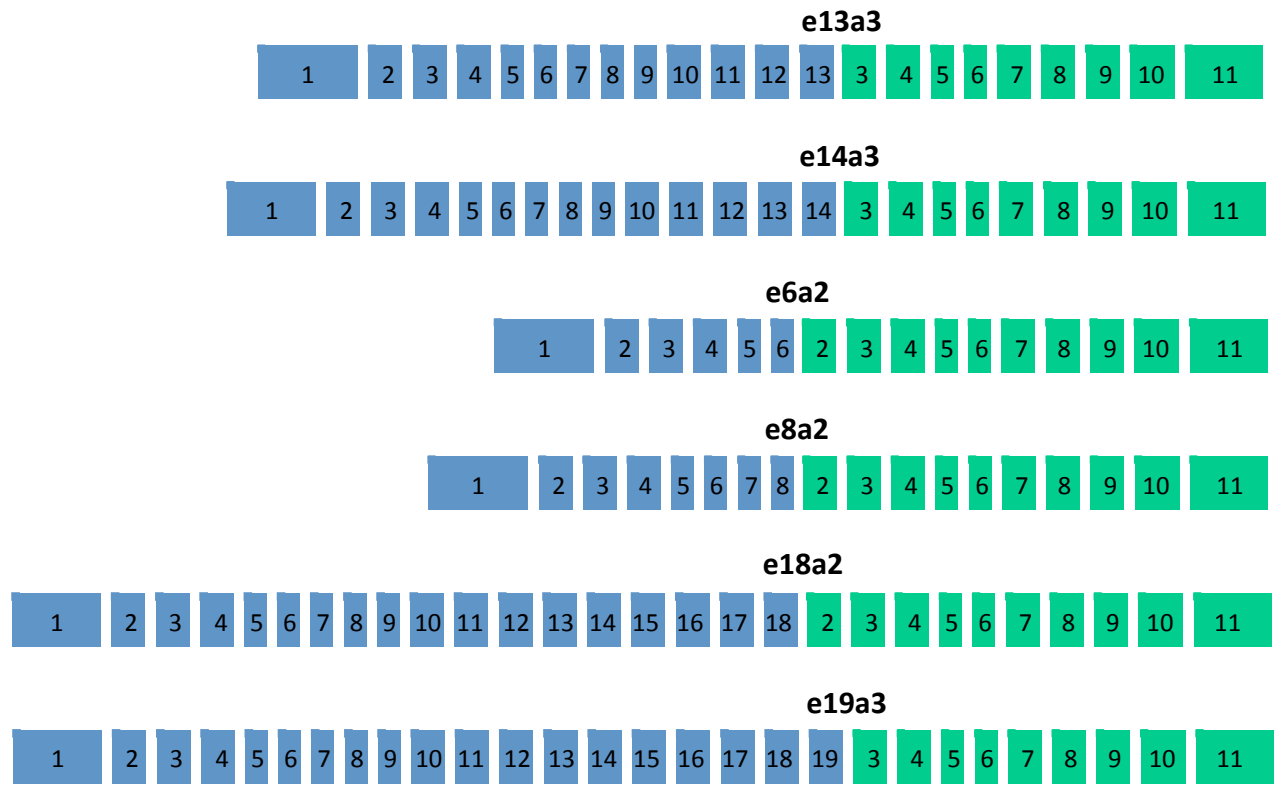

**Figure S1** – Rare *BCR-ABL1* transcripts
