# Supplementary material for: Chronic myeloid leukemia: the paradigm of targeting oncogenic tyrosine kinase signaling and counteracting resistance for successful cancer therapy
Source: Springer Nature journal article supplement (doi:10.1186/s12943-018-0780-6), 2018-02-15
Supplement: MOESM3 [file 15474718]

## Compound

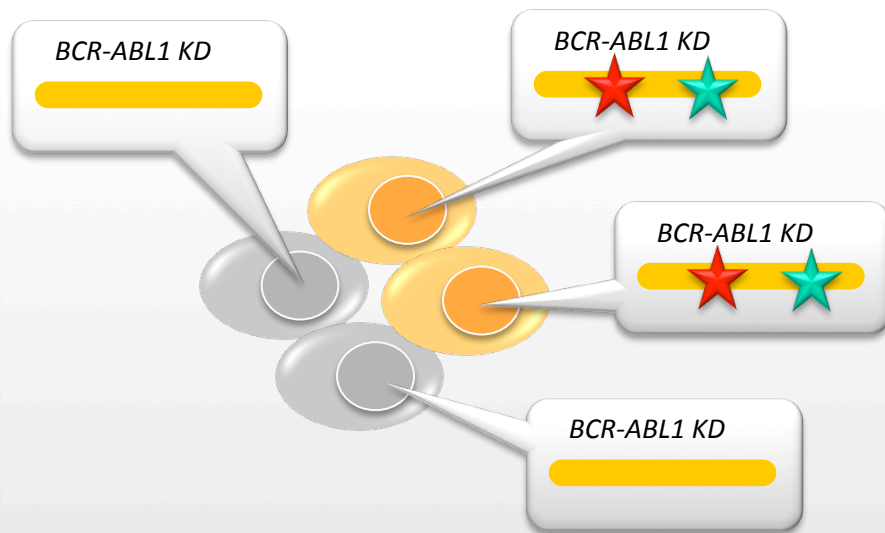

## Polyclonal

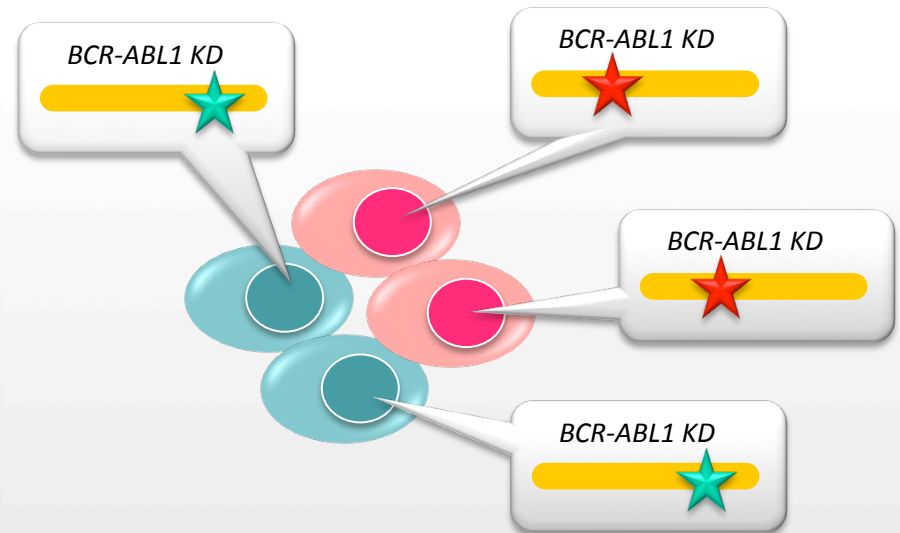

**Supplementary Figure 3** – Difference between compound and polyclonal mutations. The red and green stars indicate two distinct mutations, that may be acquired by the same BCR-ABL1 molecules (compound) or by distinct BCR-ABL1 molecules
